# Supplementary material
Source: PubMed Central journal article supplement (PMC8043980)
Supplement: NIHMS1673498-supplement-4.pdf [file NIHMS1673498-supplement-4.pdf]

## SUPPLEMENTARY TABLES

Supplementary Table S1. Cognitive assessments used as screening for enrollment in the study

---

*Cognitive Screening Tests*

---

**Memory**

Selective Reminding Test Total Learning

Selective Reminding Test Delayed Recall

Hopkins Verbal Learning Test Total Learning

Hopkins Verbal Learning Test Delayed Recall

**Executive Function**

Trail Making Test B Total Completion Time

Color Trails Test B Total Completion Time

**Language**

Semantic Fluency (Animals) Total number

Phonemic Fluency (FAS or CFL) Total number

---

Supplementary Table S2. Instructions for SCD assessment general, retrospective and age-anchored and items of SCD scales.

---

### SCD QUESTIONNAIRE INSTRUCTIONS

---

Now, I am going to ask you questions about your functioning in everyday life. For each of the statements below (point to the items) I am going to ask you whether you experience difficulty performing that specific activity.

We want to provide you with two ways of answering these questions. The first way involves you answering the questions in a *yes or no* format. For the second way, you have to indicate the *extent of difficulty* that you experience while performing that task. On this rating scale ranging from 1 to 7, 1 indicates Major Problems performing that task, 2 also indicates major problems but less so than 1. Similarly, 7 indicates No Problems performing the task, whereas 6 indicates some minimal problems.

**\*NOTE:** For analyses purposes and for future research, this scale has been recoded to a range of 0 = no problem to 6 = Major problem as shown in Figures S1-S3.

---

*Next, we will do the same thing, but now I am going to ask you to answer these same questions in a slightly different way.*

*You can use this sheet as a reference. Present sheet 2*

*Read out the first few statements, starting with, “Compared to 5 years ago, do you have difficulty...”*

---

*Next, once again I am going to ask you to answer these same questions but using this sheet as a reference. Present sheet 3.*

*Read out the first few statements, starting with, “Compared with others of your age, do you have difficulty...”*

---

### SCD QUESTIONNAIRE ITEMS

---

Remembering details of recent events in the news  
 Remembering details of recent personal events  
 Remembering things people tell you  
 Remembering if you've told someone something yet  
 Remembering details of something you recently read  
 Remembering the date or day of the week  
 Remembering the name of someone you've just met  
 Remembering appointments  
 Remembering where you put things (keys, wallets)  
 Remembering a few shopping items without a list  
 Following a map to a new location  
 Finding the word you want to use in a conversation  
 Concentrating on a task  
 Understanding what people say to you  
 Doing two things at once  
 Thinking ahead  
 Remembering the name of common objects  
 Understanding what you read

Following a story in a book  
Communicating thoughts in a conversation

---
